# Supplementary material for: Design and Analysis of Effects of Triplet Repeat Oligonucleotides in Cell Models for Myotonic Dystrophy
Source: PubMed Central journal article supplement — Mol Ther Nucleic Acids. 2013 Mar 19;2(3):e81–. doi: 10.1038/mtna.2013.9 (PMC3615819; doi:10.1038/mtna.2013.9), 2013-03-19
Supplement: mtna20139x1.pdf [file mtna20139x1.pdf]

# FIGURE S1

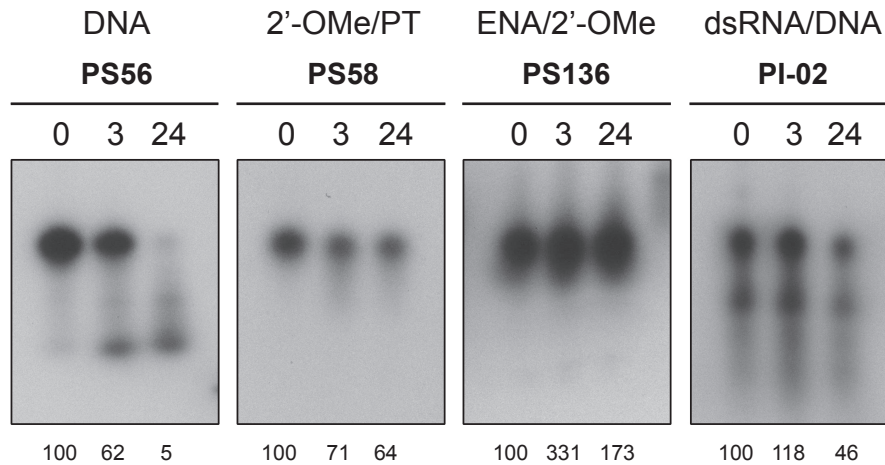

## Supplementary Figure S1.

AON stability in cell extract. AONs were end-labeled with [ $\gamma$ - $^{32}$ P] ATP, incubated in DM500 whole cell extract for 0, 3 or 24 hours and then analyzed by polyacrylamide gel electrophoresis. PS56 was almost completely degraded after 24 hours. Chemically modified AONs PS58 and PS136, and siRNA PI-02 were still present after 24 hours incubation. Numerals at the bottom indicate quantification by phosphorimager analysis.
