# Supplementary material for: Design and Analysis of Effects of Triplet Repeat Oligonucleotides in Cell Models for Myotonic Dystrophy
Source: PubMed Central journal article supplement — Mol Ther Nucleic Acids. 2013 Mar 19;2(3):e81–. doi: 10.1038/mtna.2013.9 (PMC3615819; doi:10.1038/mtna.2013.9), 2013-03-19
Supplement: mtna20139x2.pdf [file mtna20139x2.pdf]

## FIGURE S2

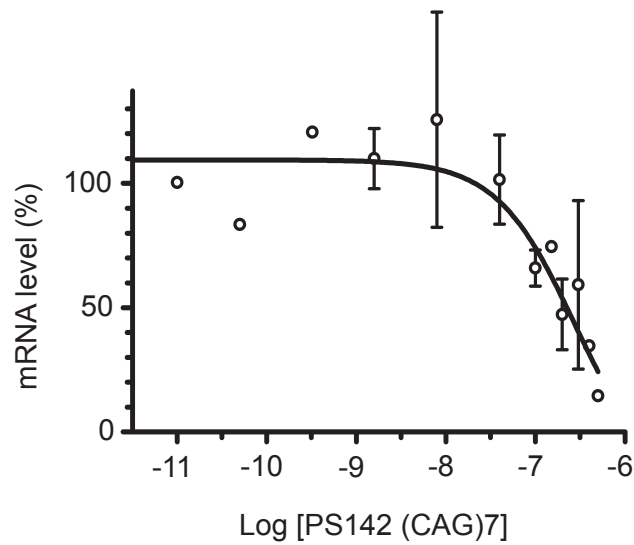

### Supplementary Figure S2.

Concentration-response curve of PS142 including raw data. DM500 myotubes were treated with a concentration series of 0.01-500 nM of this AON. RNA was isolated 48 hours post-transfection and *hDMPK* transcript levels were analyzed by Northern blotting. Data points are the mean of at least three measurements.
