# Supplementary material for: Design and Analysis of Effects of Triplet Repeat Oligonucleotides in Cell Models for Myotonic Dystrophy
Source: PubMed Central journal article supplement — Mol Ther Nucleic Acids. 2013 Mar 19;2(3):e81–. doi: 10.1038/mtna.2013.9 (PMC3615819; doi:10.1038/mtna.2013.9), 2013-03-19
Supplement: mtna20139x3.pdf [file mtna20139x3.pdf]

## FIGURE S3

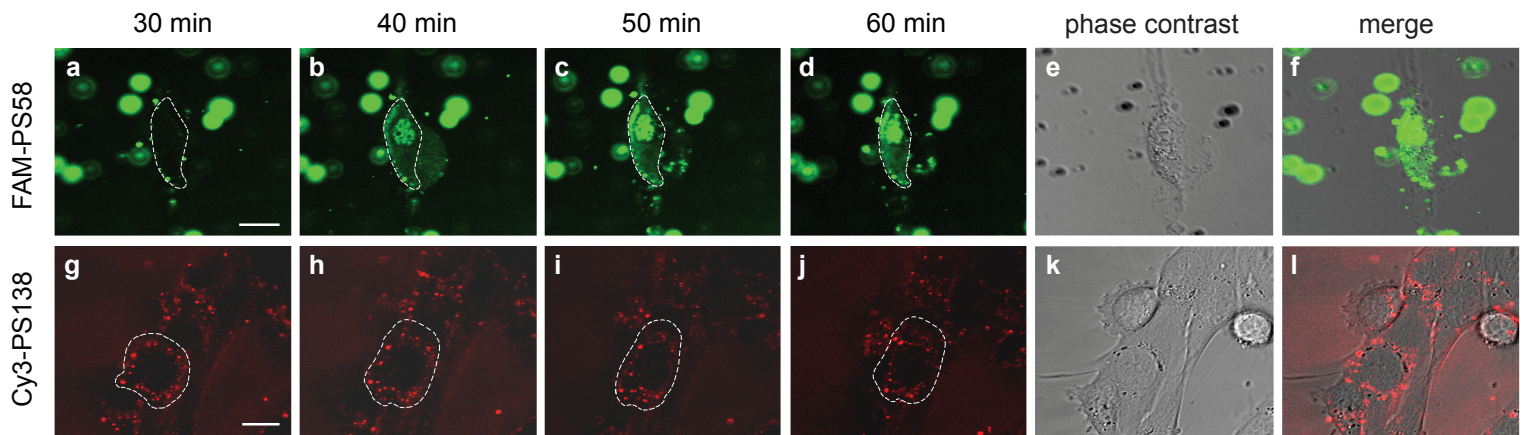

### Supplementary Figure S3.

Differential uptake and localization of AONs in DM500 myoblasts. DM500 myoblasts were transfected with (a-f) FAM-PS58 or (g-l) Cy3-PS138. Uptake was visualized by live cell imaging. Time points indicate minutes after addition of the oligo-transfection reagent complex to the culture medium. Phase contrast (e, k) and dashed lines help to recognize cell boundaries (see also merge). Essentially no nuclear localization was detected for ENA-modified PS138, whereas 2'-OMe/PT-modified PS58 showed prominent nuclear localization. Intense signals in panels a-f represent FAM-PS58-polyethyleneimine complexes in the medium. Representative images of two independent experiments are shown. The type of fluorophore used did not affect AON behaviour (data not shown). Bars: 20  $\mu\text{m}$ .
