# Supplementary material for: Design and Analysis of Effects of Triplet Repeat Oligonucleotides in Cell Models for Myotonic Dystrophy
Source: PubMed Central journal article supplement — Mol Ther Nucleic Acids. 2013 Mar 19;2(3):e81–. doi: 10.1038/mtna.2013.9 (PMC3615819; doi:10.1038/mtna.2013.9), 2013-03-19
Supplement: mtna20139x4.pdf [file mtna20139x4.pdf]

# FIGURE S4

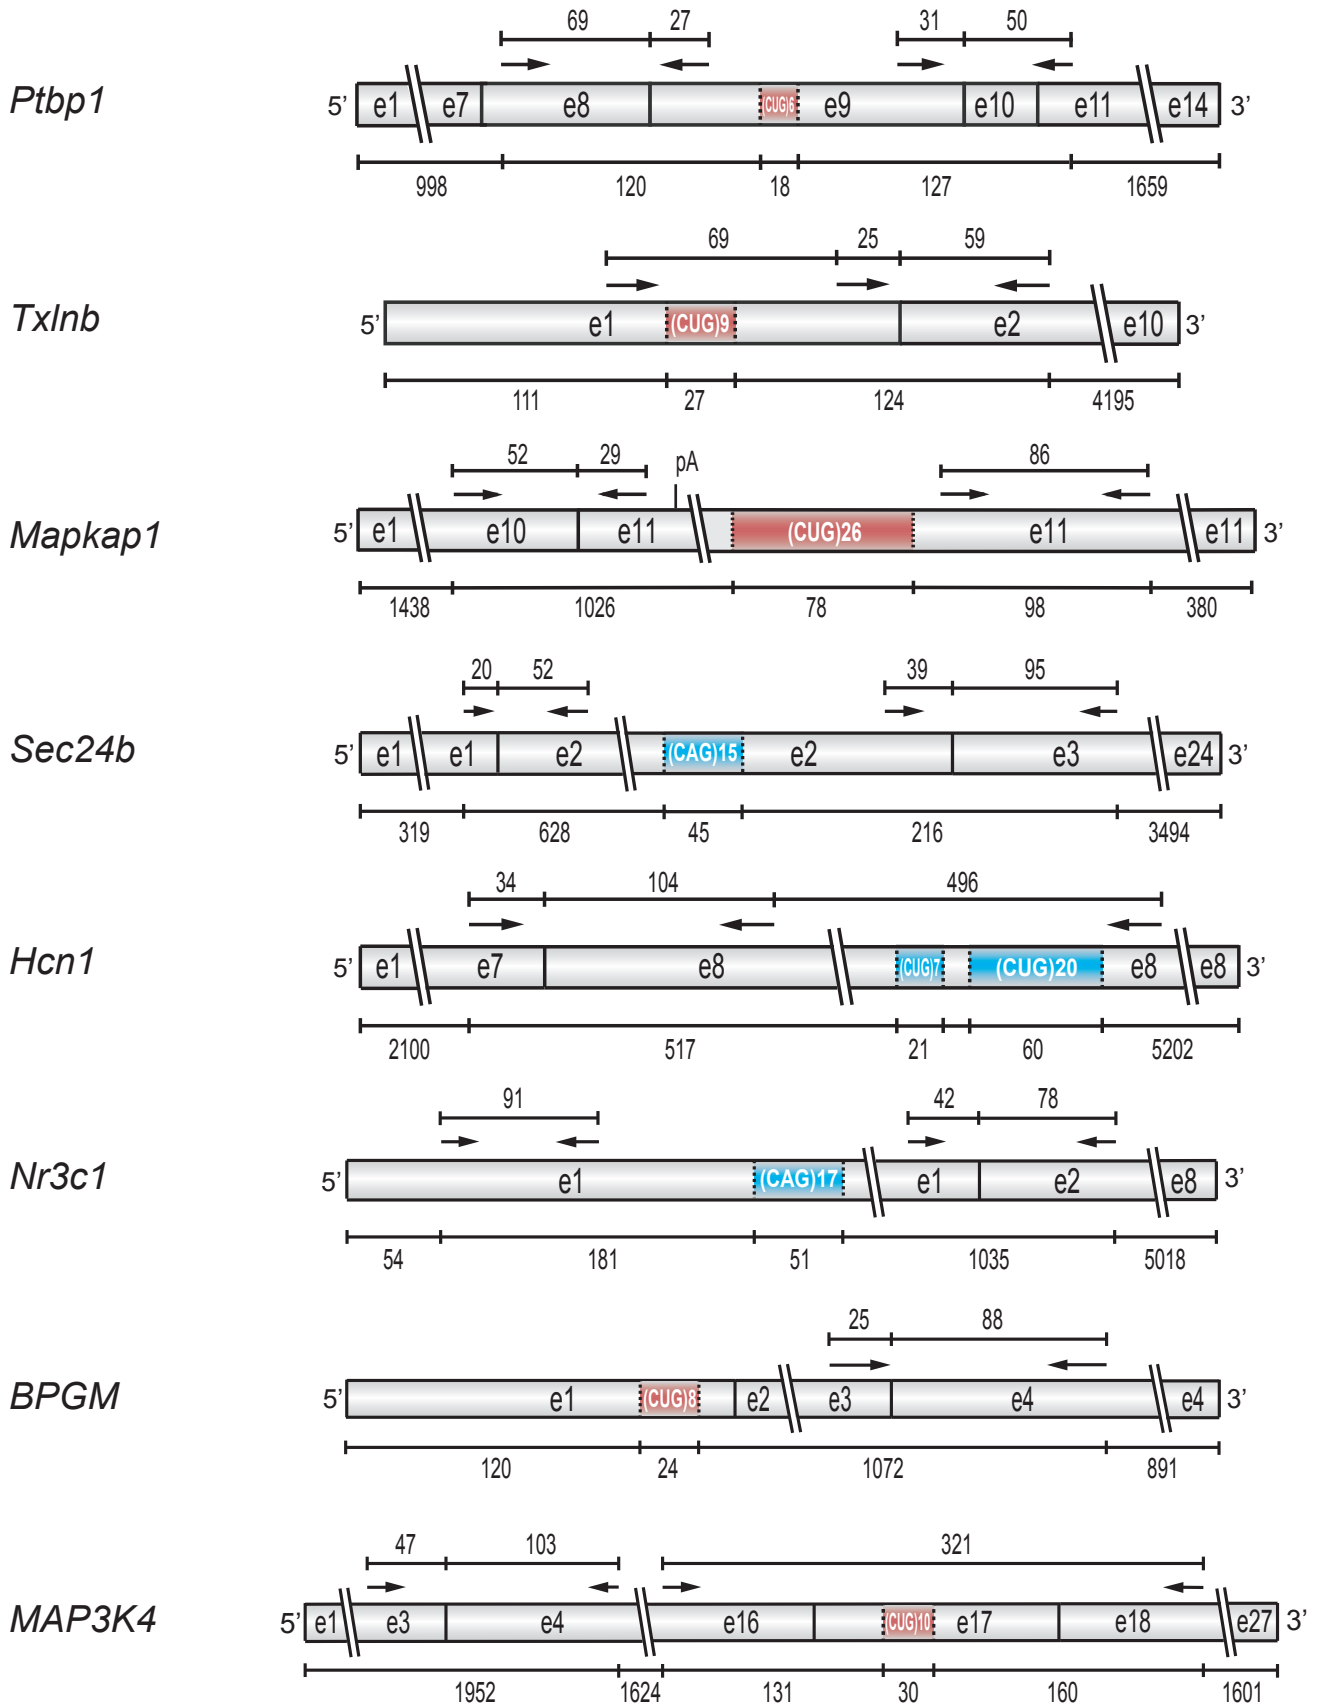

## Supplementary Figure S4.

Schematic representation of triplet repeat transcripts and segments thereof, analyzed by RT-(q)PCR. Boxes indicate exons. (CUG)*n* and (CAG)*n* tracts are highlighted in red and blue, respectively. PCR primers are represented by arrows. Transcript lengths are based on NCBI Reference Sequences and indicate nucleotides. pA indicates alternative polyadenylation site in *Mapkap1*.
