# Supplementary material for: Design and Analysis of Effects of Triplet Repeat Oligonucleotides in Cell Models for Myotonic Dystrophy
Source: PubMed Central journal article supplement — Mol Ther Nucleic Acids. 2013 Mar 19;2(3):e81–. doi: 10.1038/mtna.2013.9 (PMC3615819; doi:10.1038/mtna.2013.9), 2013-03-19
Supplement: mtna20139x5.pdf [file mtna20139x5.pdf]

## FIGURE S5

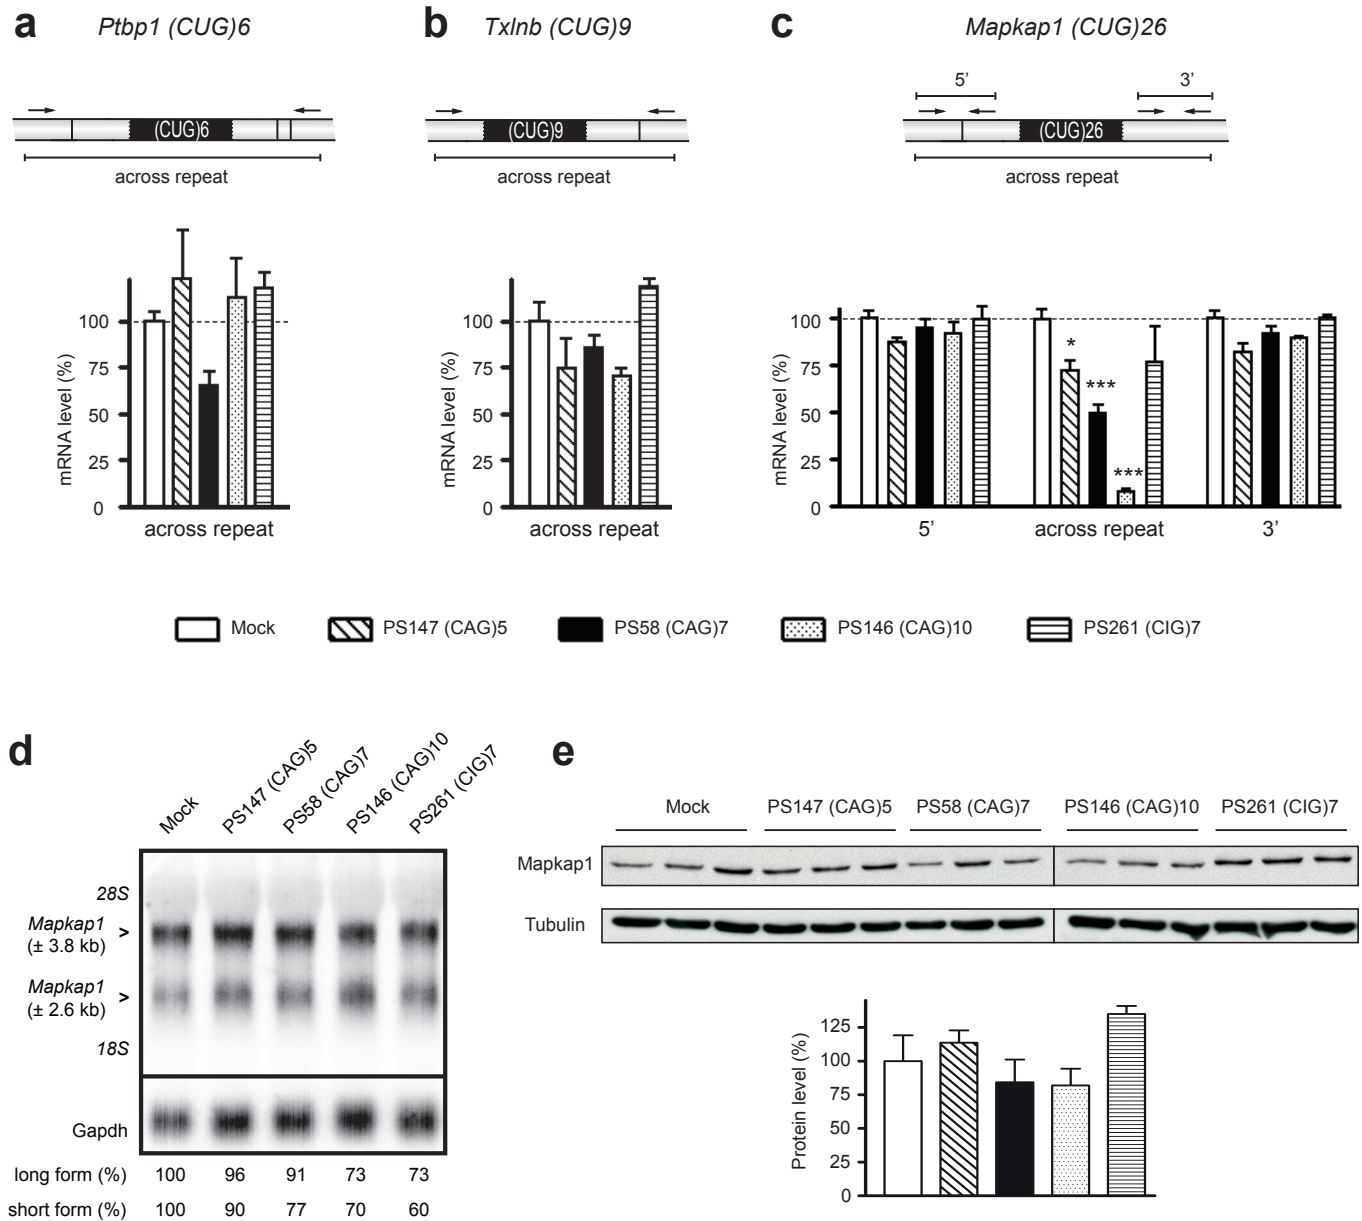

### Supplementary Figure S5.

Expression of mouse transcripts, carrying a small (CUG)*n* repeat, after transfecting DM500 myotubes with a selection of AONs: (a) *Ptbp1* (CUG)6, (b) *Txlnb* (CUG)9 and (c) *Mapkap1* (CUG)26. Semi-quantitative RT-PCR was used to be able to amplify a segment across the repeat. Schemes on top illustrate exon-exon junctions, locations of PCR primers and amplicons. Dashed lines indicate 100% levels (mock samples). (d) Northern blot containing RNA isolated from DM500 myotubes treated with repeat AONs or mock-treated. The blot was incubated with a *Mapkap1* probe and a *Gapdh* probe for normalization. Two *Mapkap1* transcripts were detected which result from alternative polyadenylation (Schroder *et al.* (2004) Gene, 339, 17-23). The (CUG)26 tract is only present in the long form (Supplemental Figure S4). Only a minor reduction in the level of both transcripts was observed upon AON treatment (indicated at the bottom). (e) *Mapkap1* protein levels were measured by Western blotting 72 h after mock or AON treatment (n=3). No significant changes in expression were observed.
