# Supplementary material for: Design and Analysis of Effects of Triplet Repeat Oligonucleotides in Cell Models for Myotonic Dystrophy
Source: PubMed Central journal article supplement — Mol Ther Nucleic Acids. 2013 Mar 19;2(3):e81–. doi: 10.1038/mtna.2013.9 (PMC3615819; doi:10.1038/mtna.2013.9), 2013-03-19
Supplement: mtna20139x6.pdf [file mtna20139x6.pdf]

# FIGURE S6

**a**

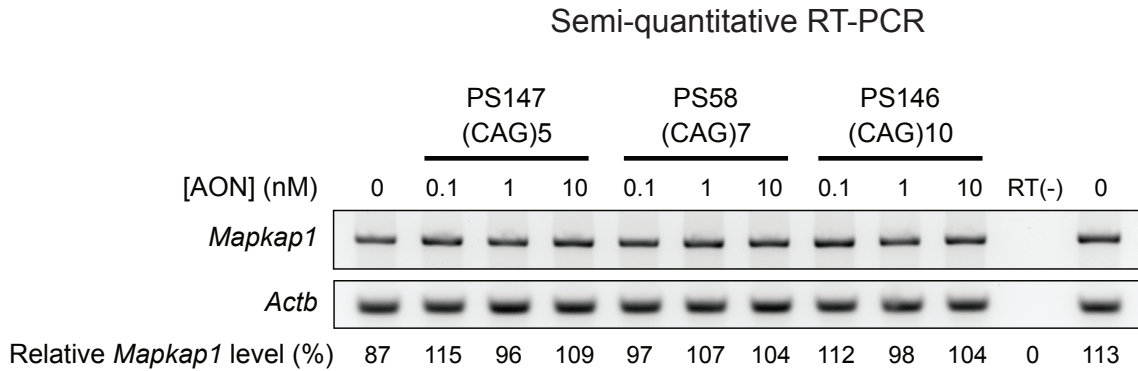

**b**

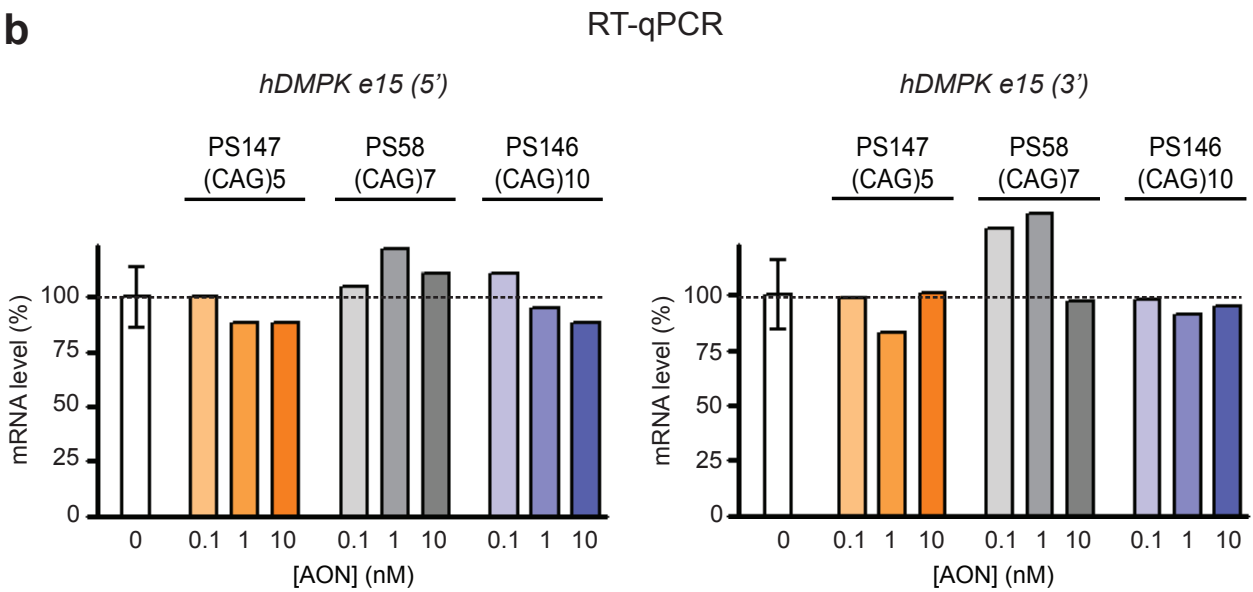

## Supplementary Figure S6.

Control experiments to exclude perturbing effects of AONs during RT-PCR quantification. **(a)** Purified RNA from DM500 myotubes was incubated with PS147, PS58 or PS146 (0 - 10 nM) and subsequently used in a semi-quantitative RT-PCR assay based on an amplicon containing the (CUG)<sub>26</sub> tract to measure *Mapkap1* (CUG)<sub>26</sub> levels. *Actb* RNA was used for normalization (see numerals at the bottom). None of the three AONs influenced RT-PCR efficiency, not even at high concentration. **(b)** The same RNA samples were used in a RT-qPCR assay to measure *hDMPK* (CUG)<sub>500</sub> RNA levels. Amplicons were located in exon 15, 5' and 3' of the (CUG)<sub>500</sub> tract. Again, no effect of (CAG)<sub>n</sub> AON pre-incubation on RT-PCR efficiency was observed. Dashed lines indicate 100% level (mock samples).
