# Supplementary material for: Design and Analysis of Effects of Triplet Repeat Oligonucleotides in Cell Models for Myotonic Dystrophy
Source: PubMed Central journal article supplement — Mol Ther Nucleic Acids. 2013 Mar 19;2(3):e81–. doi: 10.1038/mtna.2013.9 (PMC3615819; doi:10.1038/mtna.2013.9), 2013-03-19
Supplement: mtna20139x7.pdf [file mtna20139x7.pdf]

# FIGURE S7

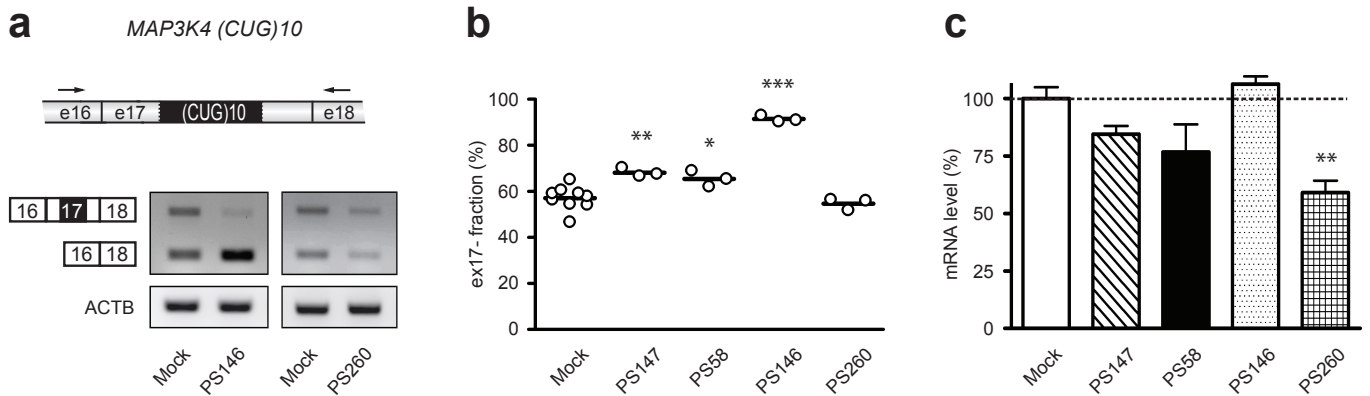

## Supplementary Figure S7.

(CAG)<sub>n</sub> oligos can modulate alternative splicing of the (CUG)<sub>n</sub>-containing exon in the *MAP3K4* primary transcript. (a) DM1 patient 5/1400 myoblasts were transfected with a selection of AONs followed by semi-quantitative RT-PCR amplifying a segment containing *MAP3K4* exon 17, including the (CUG)<sub>10</sub> repeat. The ex17<sup>-</sup> variant increased upon PS146 (CAG)<sub>10</sub> treatment, while the level of the ex17<sup>+</sup> variant decreased. Gapmer PS260 (CAG)<sub>7</sub> reduced expression of both *MAP3K4* variants. Quantification of results obtained with all four AONs are shown in **b** (ex17<sup>-</sup> fraction) and **c** (total *MAP3K4* RNA levels). Dashed line indicates 100% level (mock sample).
