# Supplementary material for: Design and Analysis of Effects of Triplet Repeat Oligonucleotides in Cell Models for Myotonic Dystrophy
Source: PubMed Central journal article supplement — Mol Ther Nucleic Acids. 2013 Mar 19;2(3):e81–. doi: 10.1038/mtna.2013.9 (PMC3615819; doi:10.1038/mtna.2013.9), 2013-03-19
Supplement: mtna20139x8.pdf [file mtna20139x8.pdf]

# FIGURE S8

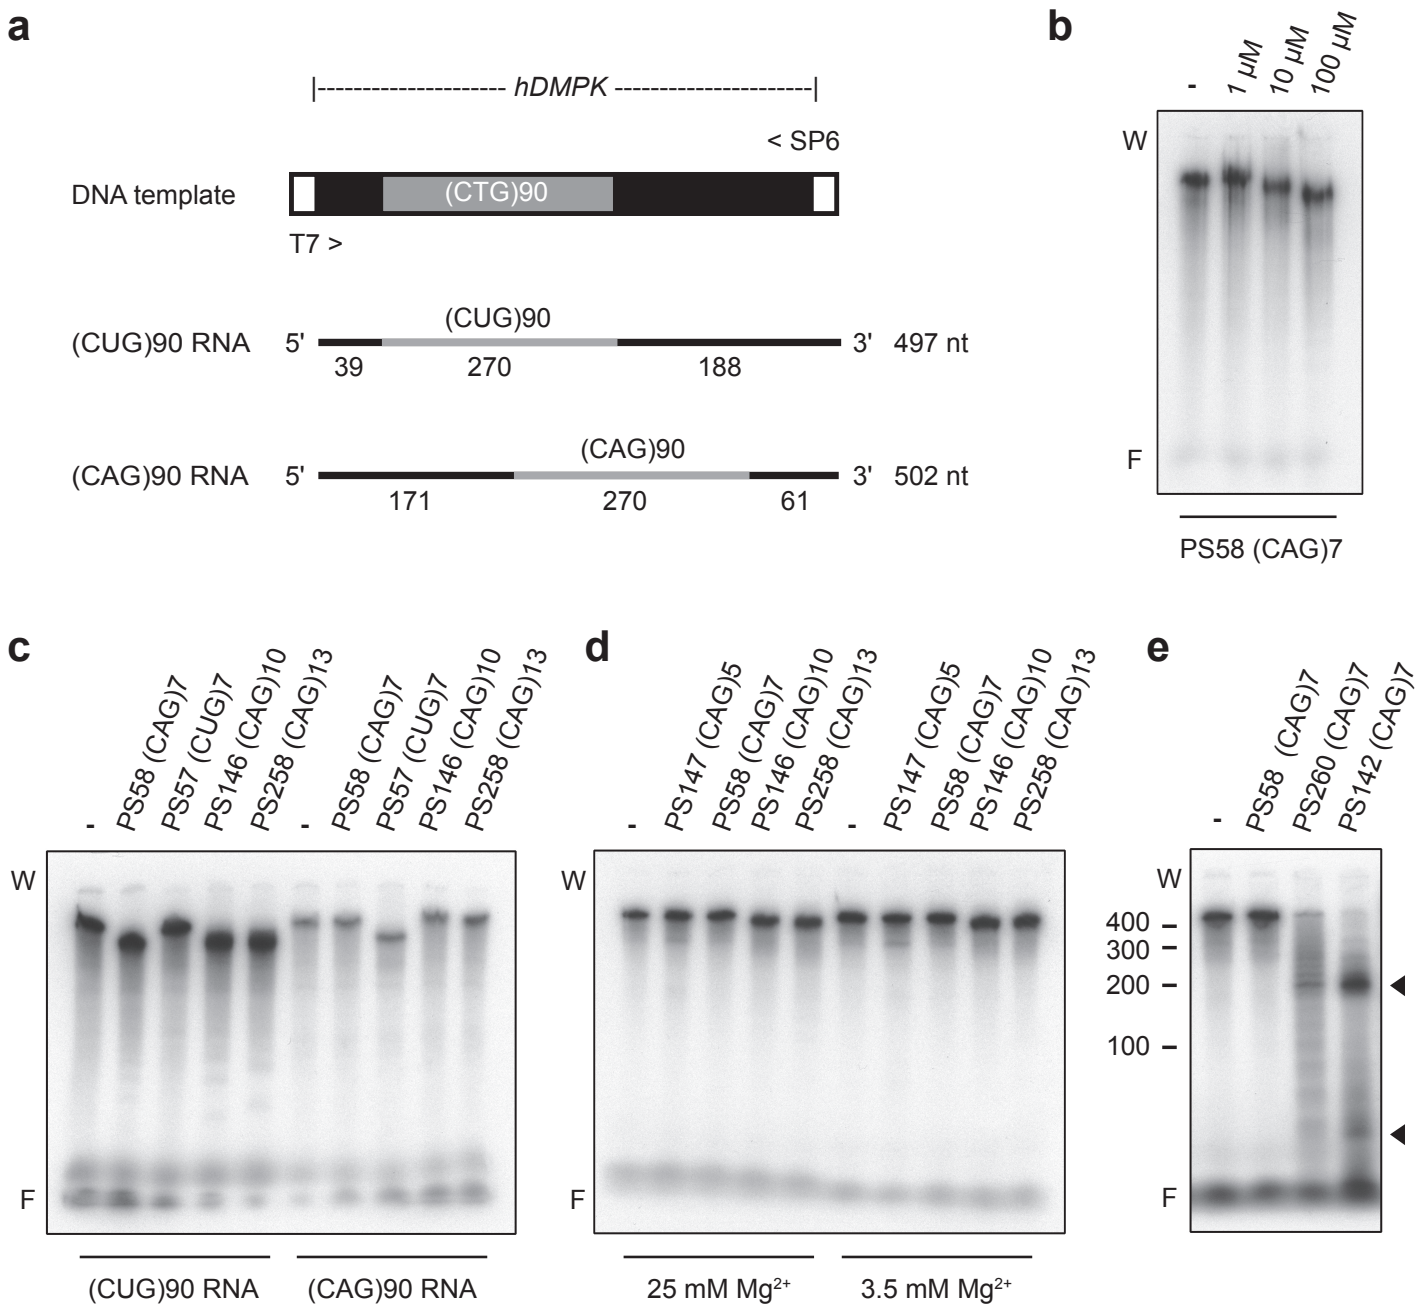

## Supplementary Figure S8.

Test-tube experiments using *in vitro* synthesized RNA bearing a (CUG)90 or (CAG)90 tract. (a) Schematic representation of the *hDMPK* gene segment flanked by T7 and SP6 promoters, obtained by PCR, used for the synthesis of RNAs with a (CUG)90 or (CAG)90 tract. (b) (CUG)90 RNA was incubated for 2 hours at 37°C with different concentrations of PS58 (CAG)7 and then loaded on a polyacrylamide gel. A concentration-dependent mobility shift was observed revealing oligo-RNA binding. (c) The same approach was followed with different (CAG)*n* or (CUG)*n* AONs and with (CUG)90 RNA and (CAG)90 RNA, with comparable results. (d) Incubation of (CUG)90 RNA with 2'-OMe/PT (CAG)*n* AONs in presence of 3.5 or 25 mM Mg<sup>2+</sup> for 2 hours at 37°C did not show any proof of ribozyme activity. (e) (CUG)90 RNA was incubated with PS58 (2'-OMe/PT), PS260 (2'-OMe/DNA/PT) or PS142 (DNA/PT) in presence of RNase H for 1 hour at 37°C. RNase H only degraded RNA in a RNA-DNA duplex (stable products indicated by arrowheads). Chemistry and sequence of AONs is listed in Figure 1a. W=position of the wells; F= front.
