# Supplementary material for: Design and Analysis of Effects of Triplet Repeat Oligonucleotides in Cell Models for Myotonic Dystrophy
Source: PubMed Central journal article supplement — Mol Ther Nucleic Acids. 2013 Mar 19;2(3):e81–. doi: 10.1038/mtna.2013.9 (PMC3615819; doi:10.1038/mtna.2013.9), 2013-03-19
Supplement: mtna20139x9.pdf [file mtna20139x9.pdf]

## FIGURE S9

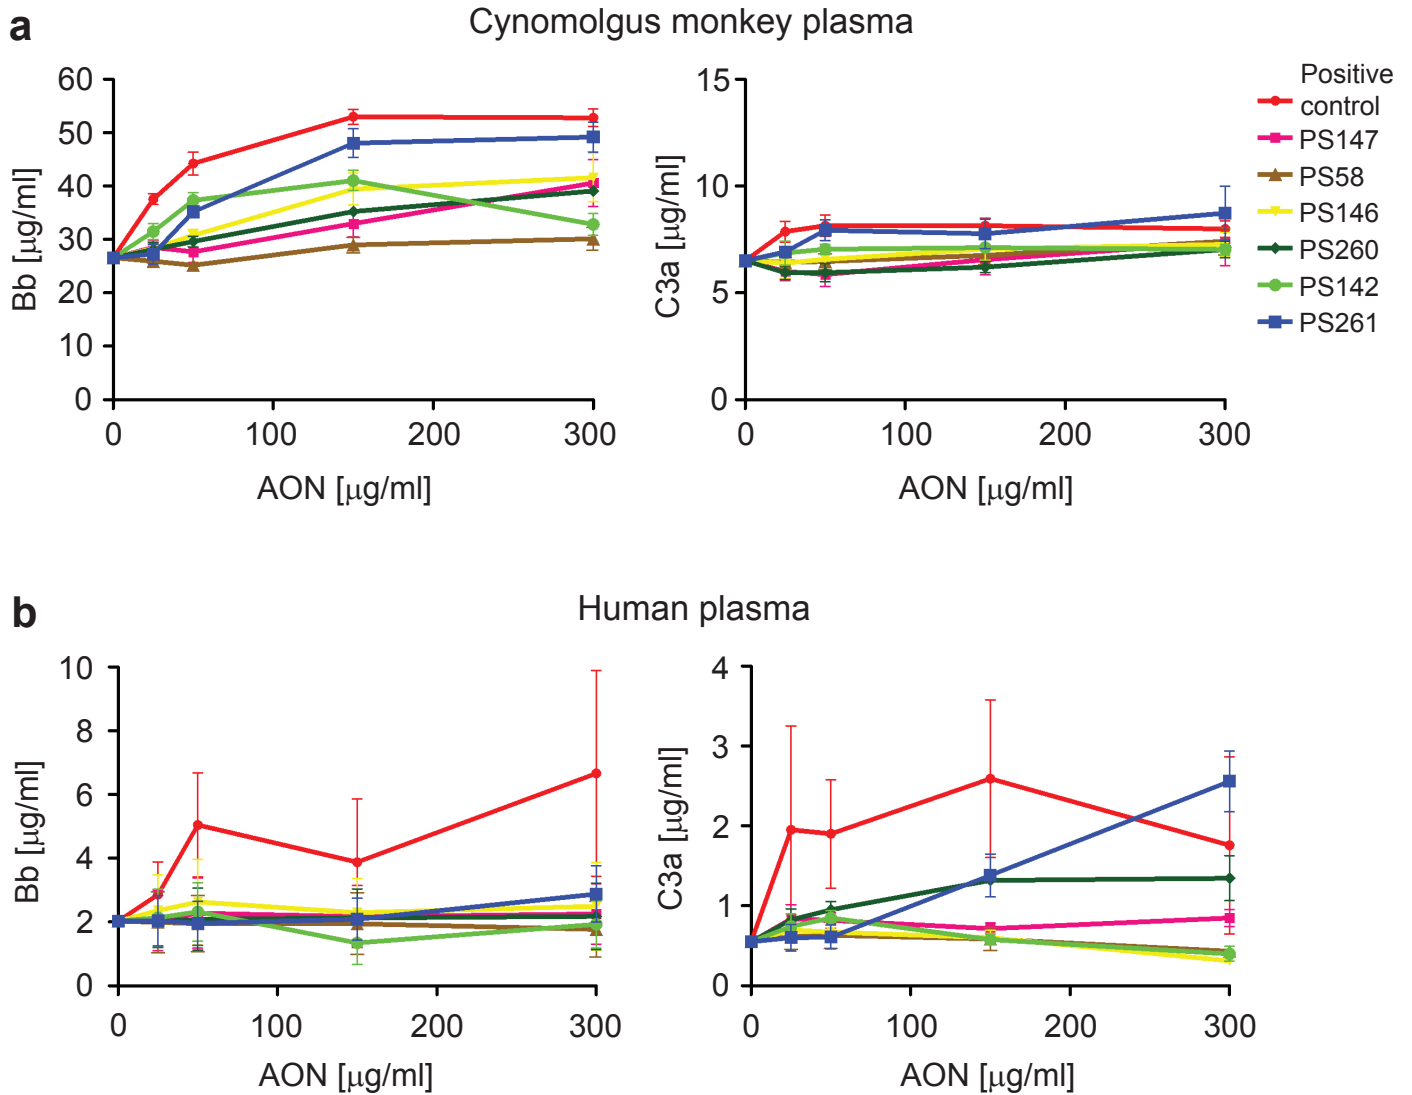

### Supplementary Figure S9.

Complement activation assay. Complement activation by a selection of AONs was examined in plasma from (a) cynomolgus monkeys or (b) humans. Formation of split products Bb (left panels) and C3a (right panels) was determined by ELISA. See Figure 1a for AON sequence and chemistry. ISIS 5132 was used as a positive control (Rudin *et al.* (2001) Clin. Cancer Res., 7, 1214-1220).
