# Supplementary material for: Design and Analysis of Effects of Triplet Repeat Oligonucleotides in Cell Models for Myotonic Dystrophy
Source: PubMed Central journal article supplement — Mol Ther Nucleic Acids. 2013 Mar 19;2(3):e81–. doi: 10.1038/mtna.2013.9 (PMC3615819; doi:10.1038/mtna.2013.9), 2013-03-19
Supplement: mtna20139x10.pdf [file mtna20139x10.pdf]

# TABLE S1

SiRNAs (RNA duplexes) used in this study.

PI-01:

5'-CAGCAGCAGCAGCAGCAGCAG-3' + 5'-GCUGCUGCUGCUGCUGCUCU -3'

PI-02:

5'-GCAGCAGCAGCAGCAGCAGCA-3' + 5'-CUGCUGCUGCUGCUGCUCUG-3'

Control:

5'-CAAGAACGAUUUGCUGACATT-3' + 5'-UGUCAGCAAUUCGUUCUUGTT-3'

Capital: DNA. Capital, underlined: RNA.
