# Supplementary material for: Design and Analysis of Effects of Triplet Repeat Oligonucleotides in Cell Models for Myotonic Dystrophy
Source: PubMed Central journal article supplement — Mol Ther Nucleic Acids. 2013 Mar 19;2(3):e81–. doi: 10.1038/mtna.2013.9 (PMC3615819; doi:10.1038/mtna.2013.9), 2013-03-19
Supplement: mtna20139x11.pdf [file mtna20139x11.pdf]

# TABLE S2

PCR primers used in this study (5' -> 3'):

## qPCR:

|                           |                           |
|---------------------------|---------------------------|
| <i>mActb</i> Fw           | GCTCTGGCTCCTAGCACCAT      |
| <i>mActb</i> Rv           | GCCACCGATCCACACAGAGT      |
| <i>mGapdh</i> Fw          | GTCGGTGTGAACGGATTTG       |
| <i>mGapdh</i> Rv          | GAACATGTAGACCATGTAGTTG    |
| <i>mPtbp1</i> (5') Fw     | GCATAATGTCAGCCTCTCCGTAT   |
| <i>mPtbp1</i> (5') Rv     | CTCCATGGACATTAGGGACAGAG   |
| <i>mPtbp1</i> (3') Fw     | TGTCCTTTTGGTCAGCAATCTG    |
| <i>mPtbp1</i> (3') Rv     | ACATCACCGTAGACGCCGA       |
| <i>mTxlnb</i> (3') Fw     | TTCTGCTTAGCTCCCTTCCT      |
| <i>mTxlnb</i> (3') Rv     | GAGTTGGGTGCTCCACTGAGAG    |
| <i>mSec24b</i> (5') Fw    | GGCACCGCCGCAGCAGAA        |
| <i>mSec24b</i> (5') Rv    | TGATGAGGCAGCCCATACCCAGAT  |
| <i>mSec24b</i> (3') Fw    | GATCCTTGGCTACAGCGAACAGC   |
| <i>mSec24b</i> (3') Rv    | AACTGGGTGACTTGGAGCAGGT    |
| <i>mHcn1</i> (5') Fw      | GAGACAGTTGCTATTGACCGACTCG |
| <i>mHcn1</i> (5') Rv      | GTCATGCTTACGATCTGCTTCAGG  |
| <i>mNr3c1</i> (5') Fw     | AGTCCCCAGCAGTTTGCTTGGC    |
| <i>mNr3c1</i> (5') Rv     | CGCAGAAACCTTGACTGTAGCTCCA |
| <i>mNr3c1</i> (3') Fw     | AACTTCGCAGGCCGCTCAGTGT    |
| <i>mNr3c1</i> (3') Rv     | CAGGCAGAGTTTTGGGAGGTGGTC  |
| <i>mMapkap1</i> (5') Fw   | GCACCTGTACTTCGAGTCCGA     |
| <i>mMapkap1</i> (5') Rv   | CTCGCTCGTGATTCCAGGAT      |
| <i>mMapkap1</i> (3') Fw   | AGGGAGAAGGAGAGCAAGCC      |
| <i>mMapkap1</i> (3') Rv   | GCATCTGGTGTAGACAGAGGTGTG  |
| <i>hDMPK</i> e1-e2 Fw     | ACTGGCCCAGGACAAGTACG      |
| <i>hDMPK</i> e1-e2 Rv     | CCTCCTTAAGCCTCACCACG      |
| <i>hDMPK</i> e4-e5 Fw     | GACCGGCGGTGGATCACG        |
| <i>hDMPK</i> e4-e5 Rv     | GGTCCCCGCCACGTAATAC       |
| <i>hDMPK</i> e15(5') Fw   | AGAACTGTCTTCGACTCCGGG     |
| <i>hDMPK</i> e15(5') Rv   | TCGGAGCGGTTGTGAACTG       |
| <i>hDMPK</i> e15(3') Fw   | TGCCTGCTTACTCGGGAAATT     |
| <i>hDMPK</i> e15(3') Rv   | GAGCAGCGCAAGTGAGGAG       |
| <i>hACTB</i> Fw           | CGGGCCGTCTTCCCCTCCAT      |
| <i>hACTB</i> Rv           | TGGGCCTCGTCGCCACATA       |
| <i>hGAPDH</i> Fw          | CCCGCTTCGCTCTCTGCTCC      |
| <i>hGAPDH</i> Rv          | CCTTCCCCTATGGTGTCTGAGCG   |
| <i>hMAP3K4</i> e16-e17 Fw | TCGGAACAGCCCCCGTCCTATGA   |
| <i>hMAP3K4</i> e16-e17 Rv | CCGCGCGTCGGAAGGCAT        |
| <i>hMAP3K4</i> e17-e18 Fw | CCCTCTGGTGGTACTCTGTGCT    |
| <i>hMAP3K4</i> e17-e18 Rv | GGGCTTGAGTGACGACTCAGGGAC  |
| <i>hMAP3K4</i> e3-e4 Fw   | TGCAAAGGGCACGTATAGCATTGG  |
| <i>hMAP3K4</i> e3-e4 Rv   | GCTCCTCCCACGACACAGCA      |
| <i>hBPGM</i> (3') Fw      | AGGGCACTCCTAAAACACCTGGAAG |
| <i>hBPGM</i> (3') Rv      | CCAACAGCACGCAGGTTTTTCATCC |

Primers for *mGapdh* were described earlier (Fu et al. (2007) J. Biomed. Mater. Res. A, 83, 770-778).

## Semi-quantitative PCR:

Primers for *Ptbp1*, *Txlnb* and *Mapkap1* were described earlier (Mulders et al. (2009) Proc. Natl. Acad. Sci. USA, 106, 13915-13920).
